# Supplementary material
Source: PubMed Central journal article supplement (PMC4675690)
Supplement: NIHMS732217-supplement-2.pdf [file NIHMS732217-supplement-2.pdf]

Supplementary Table 1. Haploid matings, genotypes, and selection conditions.

| <b>MAT<sub>a</sub></b> Genotype                                          | <b>MAT<sub>α</sub></b> Genotype                                                             | Selection                        |
|--------------------------------------------------------------------------|---------------------------------------------------------------------------------------------|----------------------------------|
| SK1 pRS414 – Cas9                                                        | SK1 ade2::gRNA (gene drive), pRS413                                                         | SC-histidine - tryptophan        |
| SK1 ade2::gRNA + URA3 (gene drive), p414-Cas9                            | SK1 pRS413                                                                                  | SC-histidine - tryptophan        |
| SK1 p414-Cas9                                                            | SK1 abd1::ABD1 recoded +gRNA (gene drive), pRS413                                           | SC-histidine - tryptophan        |
| Y12A Hygromycin B resistance (HygR)                                      | SK1 ade2::gRNA (gene drive), p416-Cas9                                                      | SC-uracil+300 ug/mL Hygromycin B |
| YPS128 Hygromycin B resistance (HygR)                                    | SK1 ade2::gRNA (gene drive), p416-Cas9                                                      | SC-uracil+300 ug/mL Hygromycin B |
| YJM981 Hygromycin B resistance (HygR)                                    | SK1 ade2::gRNA (gene drive), p416-Cas9                                                      | SC-uracil+300 ug/mL Hygromycin B |
| Y55 Hygromycin B resistance (HygR)                                       | SK1 ade2::gRNA (gene drive), p416-Cas9                                                      | SC-uracil+300 ug/mL Hygromycin B |
| UWOPS05-217.3 Hygromycin B resistance (HygR)                             | SK1 ade2::gRNA (gene drive), p416-Cas9                                                      | SC-uracil+300 ug/mL Hygromycin B |
| DBVPG 6044 Hygromycin B resistance (HygR)                                | SK1 ade2::gRNA (gene drive), p416-Cas9                                                      | SC-uracil+300 ug/mL Hygromycin B |
| 273614N Hygromycin B resistance (HygR)                                   | SK1 ade2::gRNA (gene drive), p416-Cas9                                                      | SC-uracil+300 ug/mL Hygromycin B |
| SK1 ADE2:: ADE2 silently recoded genomic target seed sequence, p414-Cas9 | SK1 ade2::gRNA (gene drive), pRS413                                                         | SC-histidine - tryptophan        |
| SK1, p414-empty                                                          | SK1 ade2::gRNA (gene drive), pRS413                                                         | SC-histidine - tryptophan        |
| BY4723 ADE2 recoded                                                      | SK1 ade2::complete gene drive (Cas9+gRNA,with recoded ADE2 target)                          | SC-histidine - tryptophan        |
| BY4723                                                                   | SK1 ade2::complete gene drive (Cas9+gRNA,with recoded ADE2 target)                          | SC-histidine - tryptophan        |
| Complete Gene drive Haploid from dissected tetrad, p413-empty            | SK1 ADE2 +reversal gene drive (Cas9+gRNA, targeting inserted orthogonal target), p416-empty | SC-histidine -uracil             |

Supplementary Table 2. Oligonucleotide primers and dsDNA fragments used for genome editing and analysis.

| Genome modification primers and gBlocks | Sequence                                                                                                                                                                                                                                                                                                                                                                                                                                                                                                                                                                                                                                                                                                                                                                                                                                                                                                                            |
|-----------------------------------------|-------------------------------------------------------------------------------------------------------------------------------------------------------------------------------------------------------------------------------------------------------------------------------------------------------------------------------------------------------------------------------------------------------------------------------------------------------------------------------------------------------------------------------------------------------------------------------------------------------------------------------------------------------------------------------------------------------------------------------------------------------------------------------------------------------------------------------------------------------------------------------------------------------------------------------------|
| ADE2.sgRNA.ade2.1.insert.F              | TACGAACCGGTAATACTAAGTGATTGACTCTTGCTGACCTTTTATTAAGAACTAAATGGtctttgaaaagataatgtatgat<br>tatgctttc                                                                                                                                                                                                                                                                                                                                                                                                                                                                                                                                                                                                                                                                                                                                                                                                                                     |
| ADE2.sgRNA.ade2.1.insert.R              | TAATAAGTGATCTTATGTATGAAATTCTTAAAAAAGGACACCTGTAAGCGTTGATTCTAagacataaaaaacaaaaaagca<br>ccac                                                                                                                                                                                                                                                                                                                                                                                                                                                                                                                                                                                                                                                                                                                                                                                                                                           |
| gRNA+CaURA3.ade2.F                      | TACGAACCGGTAATACTAAGTGATTGACTCTTGCTGACCTTTTATTAAGAACTAAATGGagacataaaaaacaaaaaagca<br>ccaccg                                                                                                                                                                                                                                                                                                                                                                                                                                                                                                                                                                                                                                                                                                                                                                                                                                         |
| gRNA+CaURA3.ade2.R                      | TAATAAGTGATCTTATGTATGAAATTCTTAAAAAAGGACACCTGTAAGCGTTGATTCTAtcgacactggatggcggcgtag<br>tatic                                                                                                                                                                                                                                                                                                                                                                                                                                                                                                                                                                                                                                                                                                                                                                                                                                          |
| ABD1.recode+gRNA                        | AGCCAGATGCCATTCAACAAGTTCTTCGTGCAGGAGATACCAAAGTGGATAGAACGTTTCAGCCCAAAGATGCGTGAGGGGCT<br>TCAGCGTAGCGACGGGCGTTACGGGGTGGAGGGTGACGAGAAAGAGGCTGCTAGCTACTTTTACACGATGTTTCGCTTTTAGAA<br>AAGTTAAGCAATACATAGAGCCTGAGTCAGTTAAACCAAATTGAACGGCTCCTCGCTGCAGACCTGCGAGCAGGGAAACGCTC<br>CCCTCACAGACGCGTTGAATTGTCCCACGCCGCCCTGTAGAGAAATATAAAAGGTTAGGATTTGCCACTGAGGTTCTTC<br>TTTCATATACTTCCTTTTAAAATCTTGCTAGGATACAGTTCTCACATCACATCCGAACATAAACACCATGGGTATGACCGAC<br>CAAGCGACGCCAACCTGCCATCACGAGATTTTCGATCCCACCGCCCTTCTATGAAAGGtctttgaaaagataatgtatgat<br>tatgctttcactcatatattatacagaaacttgatgttttctttcgagtatatacaaggtgattacatgtacgtttgaagtaca<br>actctagatttttagtgagtgccctcttgggtagcggtaaggtgcgcatTTTTTcacaccctacaatgttctgttcaaagatt<br>ttggtcaaacgctgtagaagtgaaagtgggtgcgcatgtttcggcggttcgaaacttctcgcgagtgaaagataaatgatcTGA<br>AGGGGATGAAAAGGAAGGTTTTAGAGCTAGAAATAGCAAGTTAAAATAAGGCTAGTCCGTTATCAACTTGAAAAAGTGGCACC<br>GAGTCGGTGGTGCTTTTTTTGTTTTTTATGTCT |
| ABD1.recode+gRNA.int.F                  | tatggtgtgccattcgaaccttaagaagtttggctgatgaatacggtttggactagtaAGCCAGATGCCATTCAACAAGTT<br>C                                                                                                                                                                                                                                                                                                                                                                                                                                                                                                                                                                                                                                                                                                                                                                                                                                              |
| ABD1.recode+gRNA.int.R                  | gtaatacggccgaaatacagatgctttatagtagggttattgtttctattcatttttattAGACATAAAAAACAAAAAAGCA<br>CCACC                                                                                                                                                                                                                                                                                                                                                                                                                                                                                                                                                                                                                                                                                                                                                                                                                                         |
| ADE2.gRNA                               | tctttgaaaagataatgtatgattatgctttcactcatatattatacagaaacttgatgttttctttcgagtatatacaaggtg<br>attacatgtacgtttgaagtacaactctagatttttagtgagtgccctcttgggtagcggtaaggtgcgcatTTTTTcacacc<br>tacaatgttctgttcaaagattttggtcaaacgctgtagaagtgaagttggtgcgcatgtttcggcggttcgaaacttctcc<br>gcagtgaaagataaatgatcACTTGAAGATTCTTTAGTGTGTTTTAGAGCTAGAAATAGCAAGTTAAAATAAGGCTAGTCCGT<br>TATCAACTTGAAAAAGTGGCACCAGTCCGGTGGTCTTTTTTTGTTTTTTATGTCT                                                                                                                                                                                                                                                                                                                                                                                                                                                                                                                 |
| ADE2.1.silent.seed.90mer.F              | TGATGTGCTAACGATTGAGATTGAGCATGTTGATGTTCTACCCTGAAAAACCTGCAAGTAAAACATCCCAAATTAATAATTT<br>ACCCTC                                                                                                                                                                                                                                                                                                                                                                                                                                                                                                                                                                                                                                                                                                                                                                                                                                        |
| ADE2.1.silent.seed.90mer.F              | GAAGGGTAAATTTTTAATTTGGGATGTTTTACTTGACAGGTTTTTTCAGGGTAGGAACATCAACATGCTCAATCTCAATCGTTAG<br>CACATCA                                                                                                                                                                                                                                                                                                                                                                                                                                                                                                                                                                                                                                                                                                                                                                                                                                    |
| ABD1.ver.F                              | ATAGATAATGTTCTCGAATATGTTGTGCCA                                                                                                                                                                                                                                                                                                                                                                                                                                                                                                                                                                                                                                                                                                                                                                                                                                                                                                      |
| ABD1.ver.R                              | TTACTACATATAGAAGTCTTGTAATACGGCCG                                                                                                                                                                                                                                                                                                                                                                                                                                                                                                                                                                                                                                                                                                                                                                                                                                                                                                    |
| ADE2.ver.F                              | GCTACGAACCGGTAATACTAAGTGATTG                                                                                                                                                                                                                                                                                                                                                                                                                                                                                                                                                                                                                                                                                                                                                                                                                                                                                                        |
| ADE2.ver.R                              | CAGGTAATTATTCCTTGCTTCTTGTTACTGG                                                                                                                                                                                                                                                                                                                                                                                                                                                                                                                                                                                                                                                                                                                                                                                                                                                                                                     |
| ade2_recode_MMEJ_9omer.F                | tcaaaaatggtagcagttacccaatccgtaccagttgaacaagcatctgagacgtccctattgaatggttgaaga-<br>gatttgggttttc                                                                                                                                                                                                                                                                                                                                                                                                                                                                                                                                                                                                                                                                                                                                                                                                                                       |

|                                             |                                                                                                                                                                                                                                                                                                                                                                                                                                                                                     |
|---------------------------------------------|-------------------------------------------------------------------------------------------------------------------------------------------------------------------------------------------------------------------------------------------------------------------------------------------------------------------------------------------------------------------------------------------------------------------------------------------------------------------------------------|
| ade2_re-<br>code_MMEJ_9<br>Omer.R           | gaaaacccaaatctcttccaacattcaatagggacgtctcagatgcttgttcaactggtagcgattgggtaactgctatac-<br>catttttga                                                                                                                                                                                                                                                                                                                                                                                     |
| mali.int.-<br>marker.F                      | ACAGATAAAATTTAAGAGATATTAATATTAGTGAGAAGCCGAGAATTTGTAAACACCAaattaaccctcactaaaggg                                                                                                                                                                                                                                                                                                                                                                                                      |
| mali.int.-<br>marker.R                      | CCATTTAGTTCTTAATAAAAAGGTCAGCAAGAGTCAATCACTTAGTATTACCCGGTTCGTACCTCTGACACATGCAGCTCCCGG                                                                                                                                                                                                                                                                                                                                                                                                |
| ade.com-<br>plete.GD.in<br>sert.F           | AGACAGATAAAATTTAAGAGATATTAATATTAGTGAGAAGCCGAGAATTTGTAAACACCACATAGCTTCAAATGTTTC-<br>TACTCCTTTT                                                                                                                                                                                                                                                                                                                                                                                       |
| ade.com-<br>plete.GD.in<br>sert.R           | ATGTATGTATAATAAGTGATCTTATGTATGAAATTCTTAAAAAAGGACACCTGTAAGCGTTGATTTCTACCCCACT-<br>GTGGGGTGGAGGGG                                                                                                                                                                                                                                                                                                                                                                                     |
| sgRNAmal-<br>i.sgRNA2                       | TATAGGGCGAATTGGTctttgaaaagataatgtatgattatgctttcactcatatttatacagaaacttgatggtttctttc-<br>gagtataatacaaggtgattacatgtacgtttgaaagtaacaactctagattttgtagtgccctctgggctagcggtaaaggt-<br>gcgcatTTTTTcacaccctacaatgttctgttcaaaagattttggtcaaacgctgtagaagtgaaagttggtgcgcat-<br>gtttcggcggttcgaaacttctccgcagtgaaagataaatgatcgtcccctccaccacagtggttttagagctatgct-<br>gaaaagcatagcaagttaaaataaggcagtgatttttaataccagtcggtacacaactgaaaaagtgcgccagctcggt-<br>gcTTTTTTTGTTTTTTATGTCTGTACCGGCCGCAAT       |
| ade2_wt_in-<br>sert_PAM_gR<br>NA_gBLOCK     | TATAGGGCGAATTGGTctttgaaaagataatgtatgattatgctttcactcatatttatacagaaacttgatggtttctttc-<br>gagtataatacaaggtgattacatgtacgtttgaaagtaacaactctagattttgtagtgccctctgggctagcggtaaaggt-<br>gcgcatTTTTTcacaccctacaatgttctgttcaaaagattttggtcaaacgctgtagaagtgaaagttggtgcgcat-<br>gtttcggcggttcgaaacttctccgcagtgaaagataaatgatcattcaatagggacgtctcacGTTTAGAGCTAGAAATAG-<br>CAAGTTAAAATAAGGCTAGTCCGTTATCAACTTAAAAAGTGGCACCGAGTCCGGTGGTGCTTTTTTTGTTTTTTATGTCTg-<br>taccggcggcaaat                       |
| ade2.MME-<br>J.sil.GD.RC                    | ATTTGCGGCCGGTACTctttgaaaagataatgtatgattatgctttcactcatatttatacagaaacttgatggtttctttc-<br>gagtataatacaaggtgattacatgtacgtttgaaagtaacaactctagattttgtagtgccctctgggctagcggtaaaggt-<br>gcgcatTTTTTcacaccctacaatgttctgttcaaaagattttggtcaaacgctgtagaagtgaaagttggtgcgcat-<br>gtttcggcggttcgaaacttctccgcagtgaaagataaatgatcagatgcttgggtcaactggtaGTTTAGAGCTAGAAATAG-<br>CAAGTTAAAATAAGGCTAGTCCGTTATCAACTTAAAAAGTGGCACCGAGTCCGGTGGTGCTTTTTTTGTTTTTTATGTCT-<br>gtcccctccaccacagtggggCCAATTCGCCCTATA |
| TRS33.F                                     | ATGTCTCTACACATAGTAATAATGTAGGACATCCC                                                                                                                                                                                                                                                                                                                                                                                                                                                 |
| TRS33.R                                     | TTACTGCGGCATTGTGACTTGAACATGG                                                                                                                                                                                                                                                                                                                                                                                                                                                        |
| DPP1.F                                      | ATGGGCAAACCGCGGATAATCATG                                                                                                                                                                                                                                                                                                                                                                                                                                                            |
| DPP1.R                                      | CTATTTGTCGTCTTTAATGATAGCAGACCTATTAAG                                                                                                                                                                                                                                                                                                                                                                                                                                                |
| VAM3.F                                      | ATGTCCTTTTTTCGACATCGAAGCACA                                                                                                                                                                                                                                                                                                                                                                                                                                                         |
| VAM3.R                                      | CTAACTTAATACAGCAAGCAATACCACCATG                                                                                                                                                                                                                                                                                                                                                                                                                                                     |
|                                             |                                                                                                                                                                                                                                                                                                                                                                                                                                                                                     |
| <b>qPCR<br/>Primers</b>                     | <b>Sequence</b>                                                                                                                                                                                                                                                                                                                                                                                                                                                                     |
| ade2.WT.qPC<br>R.F                          | TACGAACCGGGTAATACTAAGTGATTGACTC                                                                                                                                                                                                                                                                                                                                                                                                                                                     |
| ade2.gRNA.q<br>PCR.R                        | CGCTAGCCCAAGAGGGCACTACA                                                                                                                                                                                                                                                                                                                                                                                                                                                             |
| ade2.WT.qPC<br>R.R                          | TACCAACTGTTCTAGAATCCATACTTGATTGTTT                                                                                                                                                                                                                                                                                                                                                                                                                                                  |
| URA3.genedr<br>ive.ade2.WT<br>.qPCR.F       | TACGAACCGGGTAATACTAAGTGATTGACTC                                                                                                                                                                                                                                                                                                                                                                                                                                                     |
| URA3.genedr<br>ive.ade2.WT<br>.qPCR.R       | CCTCCTAATATACCAACTGTTCTAGAATCCAT                                                                                                                                                                                                                                                                                                                                                                                                                                                    |
| URA3.genedr<br>ive.<br>ade2.gRNA.q<br>PCR.R | AAACTTCTCCGCAGTGAAAGATAAATGATC                                                                                                                                                                                                                                                                                                                                                                                                                                                      |
| ABD1_rec_qP<br>CR.R                         | CGAGGAGCCGTTCAATTTGGTTTAACTGAC                                                                                                                                                                                                                                                                                                                                                                                                                                                      |
| ABD1_rec_qP<br>CR.F                         | AGATGCGTGAGGGGCTTCAGC                                                                                                                                                                                                                                                                                                                                                                                                                                                               |
| ABD1_WT_qPC<br>R<br>(JDwt1.4).F             | <b>GAAGGGGATGAAAAGGAAGC</b>                                                                                                                                                                                                                                                                                                                                                                                                                                                         |

|                                             |                                        |
|---------------------------------------------|----------------------------------------|
| ABD1_WT_qPCR<br>R<br>(JDwt1.3).R            | <b>CGCTTTCCGGTTCGATATAC</b>            |
| ACT1.qPCR.F                                 | <b>CGAAAGATTCAGAGCCCCAGAAGCT</b>       |
| ACT1.qPCR.R                                 | <b>CGGTGATTTCTTTTGCATTCTTTTCG</b>      |
| mali.qPCR.F                                 | <b>GTGATGACTCTTGCTGACTTTTATTAAGAAC</b> |
| mal-<br>i.qPCR.R.re<br>versal               | <b>CAATCATACGTCCCAATTGTCCCCCTC</b>     |
| ADE2.MME-<br>J.qPCR.F                       | <b>AGATAAATGATCAGATGCTTGTTCAACTGG</b>  |
| ADE2.MME-<br>J.qPCR.R                       | <b>AAGGACACCTGTAAGCGTTGATTTCTA</b>     |
| complete.-<br>gene.-<br>drive.qPCR.<br>GD.F | <b>GTCCCCTCCACCCACAGTGG</b>            |
| complete.-<br>gene.-<br>drive.qPCR.<br>WT.R | <b>TCCTCGGTTCTGCATTGAGCCG</b>          |
| complete.-<br>gene.-<br>drive.qPCR.<br>WT.F | <b>AATGTGGACTTCATACATAGAAATCAACGC</b>  |

## Supplementary Note

In order to spread through a population, the inheritance advantage provided by a gene drive must outweigh the fitness cost imposed. For example, an RNA-guided gene drive that imposes no fitness cost to a sexually reproducing organism and is perfectly copied upon fertilization will be inherited twice as often as a non-driving gene when rare. But if the drive imposes a fitness penalty of 50%, it will be fitness neutral under the same circumstances: although inherited twice as often, carriers will on average produce only half as many offspring.

For drives spreading through populations that frequently reproduce asexually, the fitness cost must be considerably lower because the inheritance advantage is only realized during sexual reproduction, while the cost also applies to asexual generations. For example, if *S. cerevisiae* reproduces sexually at a frequency comparable to the related *S. paradoxus* in the wild, e.g. only once for every 1000 asexual generations, the fitness cost can presumably be no more than 0.1%<sup>31</sup>. The ability of a synthetic endonuclease-based gene drive element to spread through wild populations of organisms that frequently reproduce asexually is consequently much reduced. Counterintuitively, natural homing endonucleases are most often found in organisms that frequently reproduce asexually. Following Burt and Koufopanou, this may be because rapid fixation of such an element is an evolutionary disadvantage over the long term due to the loss of selective pressure for continued function and subsequent degradation<sup>3</sup>.

## Supplementary References

31. Tsai, I.J., Bensasson D, Burt A, Koufopanou V. Population genomics of the wild yeast *Saccharomyces paradoxus*: Quantifying the life cycle. *Proc. Natl. Acad. Sci USA* **105**:4957-62 (2008)
